# Supplementary material
Source: MDPI journal article supplement (https://www.mdpi.com/2071-1050/11/2/372)
Supplement: s1 [file s1]

*Supplementary file*

# The Uneven Price Impact of Energy Efficiency Ratings on Housing Segments. Implications for Public Policy and Private Markets

## 1. The aim of this document:

This document is aimed to implement the resulting marginal prices from the market-segmented hedonics models contained in the paper in the valuation of 3 subjects using the Comparison Approach. In doing so, the methodology suggested by De Ruggiero et al (2017) has been followed.

## 2. Methodology

The methodology for each of the identified segments (i.e. Cluster 1, 2 and 3) in the main body of the paper the following stages have been used:

- 1) First, departing from the semi-elasticities found the respective hedonic models the average marginal price, in Euro, per unit has been computed.
- 2) Second, a subject for each of the segments has been designed. In designing it, special care has been taken so as to approximate it to the typical features and location dominant in each of the segments.
- 3) Third, following the Spanish main legislation governing the Comparison Approach (OM Eco 805/2003) six comparable have been selected among the original dataset. As it has been in the main body, actual transaction prices are not public in Spain, for that reason the aforementioned legislation allows for the use of listing data in the valuation of real estate. Also, a new inquiry in present listing data has been discarded, since in the last two years the price of real estate has increased following the general recovery of the macroeconomic indicators. In selecting the comparable cases, close attention has been paid to the necessity to find cases as close as possible as the subject, especially to what is regarded to the locational attributes. This recommendation comes from what is usual in the practice and from the national legislation regulating valuations in Spain (e.g. RD 1020/1993 on cadastral valuation, RD 1492/2011 on urban valuation).
- 4) We have adjusted the price of each of the 6 comparables by each of the 3 segments following the procedure contained in De Ruggiero et al (2017), namely in section 5.3. In our case, due to the fact that marginal prices come from semi-elasticities it has been no necessary to calculate the coefficient  $r_j$ . In fact, if such a coefficient is used, in our case, the adjusted prices do gain dispersion (i.e. the variation coefficient increases).
- 5) Finally, for each of the 3 segments, the assessed value has been calculated as the arithmetic media.

### 3. Results

The following subsections contain the results for each of the segments.

#### 3.1 Results for segment 1 (older dwellings in wealthy zones)

Table S1 Data Description for segment 1 (older dwellings in wealthy zones)

| Asking Price and Real Estate Features | Comparable A | Comparable B | Comparable C | Comparable D |
|---------------------------------------|--------------|--------------|--------------|--------------|
| Asking price (euros)                  | 295,000      | 355,000      | 330,000      | 300,000      |
| Area (m2)                             | 110          | 116          | 114          | 114          |
| Air conditioner (dummy: Yes=1; No=0)  | 1            | 0            | 1            | 1            |
| Area^2 (sq. m2)                       | 12,100       | 13,456       | 12,996       | 12,996       |
| Lift x floor level                    | 1            | 4            | 3            | 3            |
| A (dummy: Yes=1; No=0)                | 0            | 0            | 0            | 0            |
| % people holding university degree    | 41.21        | 56.47        | 44.68        | 31.76        |
| CP high socioeconomic level           | 0.75         | 0.65         | 0.54         | 0.51         |

  

| Asking Price and Real Estate Features | Comparable E | Comparable F | Comparable G | Subject |
|---------------------------------------|--------------|--------------|--------------|---------|
| Asking price (euros)                  | 290,000      | 280,000      | 290,000      | ?       |
| Area (m2)                             | 108          | 106          | 115          | 110     |
| Air conditioner (dummy: Yes=1; No=0)  | 0            | 1            | 0            | 1       |
| Area^2 (sq. m2)                       | 11,664       | 11,236       | 13,225       | 12,100  |
| Lift x floor level                    | 2            | 1            | 2            | 2       |
| A (dummy: Yes=1; No=0)                | 0            | 0            | 0            | 1       |
| % people holding university degree    | 46.00        | 40.16        | 38.80        | 42.00   |
| CP high socioeconomic level           | 0.76         | 0.76         | 0.76         | 0.60    |

Source: Own elaboration

Table S2 Adjustment process for segment 1 (older dwellings in wealthy zones)

| Asking Price and Real Estate Features | Comparable A                      | Comparable B                       | Comparable C                        | Comparable D                        |
|---------------------------------------|-----------------------------------|------------------------------------|-------------------------------------|-------------------------------------|
| Asking price                          | 295,000                           | 355,000                            | 330,000                             | 300,000                             |
| Area                                  | 6,067.44 x (110-110)=0            | 6,067.44 x (110-116)= -36,404.63   | 6,067.44 x (110-114)= -24,269.76    | 6,067.44 x (110-114)= -24,269.76    |
| Air conditioner                       | 20,696.29 x (1-1)=0               | 20,696.29 x (1-0)=20,696.29        | 20,696.29 x (1-1)=0                 | 20,696.29 x (1-1)=0                 |
| Area^2                                | -12.22 x (12,100-12,100)=0        | -12.22 x (12,100-13,456)=16,575.33 | -12.22 x (12,100-12,996)=10,952.43  | -12.22 x (12,100-12,996)=10,952.43  |
| Lift x floor level                    | 5,218.06 x (2-1)=5,218.06         | 5,218.06 x (2-4)= -10,436.12       | 5,218.06 x (2-3)= -5,218.06         | 5,218.06 x (2-3)= -5,218.06         |
| A                                     | 42,031.54 x (1-0)=42,031.54       | 42,031.54 x (1-0)=42,031.54        | 42,031.54 x (1-0)=42,031.54         | 42,031.54 x (1-0)=42,031.54         |
| % people holding university degree    | 3,124.66 x (42-41.21)=2,461.75    | 3,124.66 x (42-56.47)= -45,198.27  | 3,124.66 x (42-44.68)= -8,377.82    | 3,124.66 x (42-31.76)= 32,005.19    |
| CP high socioeconomic level           | -53,735.96 x (0.60-0.75)=8,109.75 | -53,735.96 x (0.60-0.65)=2,626.50  | -53,735.96 x (0.60-0.54)= -3,098.44 | -53,735.96 x (0.60-0.51)= -4,775.39 |
| Corrected Price                       | 352,821                           | 344,891                            | 342,020                             | 350,726                             |

  

| Asking Price and Real Estate Features | Comparable E                        | Comparable F                         | Comparable G                       |
|---------------------------------------|-------------------------------------|--------------------------------------|------------------------------------|
| Asking price                          | 290,000                             | 280,000                              | 290,000                            |
| Area                                  | 6,067.44 x (110-108)= 12,134.88     | 6,067.44 x (110-106)= 24,269.76      | 6,067.44 x (110-115)= -30,337.20   |
| Air conditioner                       | 20,696.29 x (1-0)=20,696.29         | 20,696.29 x (1-1)=0                  | 20,696.29 x (1-0)=20,696.29        |
| Area^2                                | -12.22 x (12,100-11,664)= -5,329.53 | -12.22 x (12,100-11,236)= -10,516.27 | -12.22 x (12,100-13,225)=13,751.66 |
| Lift x floor level                    | 5,218.06 x (2-2)= 0                 | 5,218.06 x (2-1)= 5,218.06           | 5,218.06 x (2-2)= 0                |
| A                                     | 42,031.54 x (1-0)=42,031.54         | 42,031.54 x (1-0)=42,031.54          | 42,031.54 x (1-0)=42,031.54        |
| % people holding university degree    | 3,124.66 x (42-46)= -12,511.83      | 3,124.66 x (42-40.16)= 5,757.74      | 3,124.66 x (42-38.80)= 9,990.43    |
| CP high socioeconomic level           | -53,735.96 x (0.60-0.76)= 8,842.14  | -53,735.96 x (0.60-0.76)= 8,842.14   | -53,735.96 x (0.60-0.76)= 8,842.14 |
| Corrected Price                       | 355,863                             | 355,558                              | 354,975                            |

  

|                                 |         |                                      |        |
|---------------------------------|---------|--------------------------------------|--------|
| Unadjusted average value (Euro) | 305,714 | Unadjusted standard deviation (Euro) | 26,837 |
| Adjusted media value (Euro)     | 350,979 | Adjusted standard deviation (Euro)   | 5,501  |

Source: Own elaboration

### 3.2 Results for segment 2 (recent apartments in upper-middle class zones)

Table S3 Data Description for segment 2 (recent apartments in upper-middle class zones)

| Asking Price and Real Estate Features   | Comparable A | Comparable B | Comparable C | Comparable D |
|-----------------------------------------|--------------|--------------|--------------|--------------|
| Asking price (euros)                    | 170,000      | 165,000      | 165,000      | 165,000      |
| Area (m2)                               | 91           | 75           | 85           | 85           |
| Air conditioner (dummy: Yes=1; No=0)    | 1            | 1            | 1            | 1            |
| Number of bathrooms                     | 2            | 1            | 2            | 2            |
| Heating                                 | 1            | 1            | 1            | 1            |
| Quality-retrofit indicator              | 0            | 0            | 1            | 0            |
| Area^2                                  | 8,281        | 5,625        | 7,225        | 7,225        |
| Construction year between 1982 and 2006 | 1            | 0            | 1            | 0            |
| Construction year after 2007            | 0            | 1            | 0            | 0            |
| Lift x floor level                      | 0            | 3            | 2            | 1            |
| Communal swimming pool                  | 0            | 0            | 0            | 0            |
| Floor/area ratio                        | 1.44         | 1.68         | 0.91         | 1.27         |
| % people holding university degree      | 12.42        | 21.66        | 9.69         | 18.70        |
| CP high socioeconomic level             | -0.84        | -0.08        | -1.18        | -0.23        |

  

| Asking Price and Real Estate Features   | Comparable E | Comparable F | Comparable G | Subject |
|-----------------------------------------|--------------|--------------|--------------|---------|
| Asking price (euros)                    | 160,000      | 162,000      | 160,000      | ?       |
| Area (m2)                               | 80           | 97           | 75           | 84      |
| Air conditioner (dummy: Yes=1; No=0)    | 0            | 0            | 1            | 1       |
| Number of bathrooms                     | 2            | 2            | 1            | 1       |
| Heating                                 | 1            | 1            | 1            | 1       |
| Quality-retrofit indicator              | 0            | 0            | 1            | 1       |
| Area^2                                  | 6,400        | 9,409        | 5,625        | 7056    |
| Construction year between 1982 and 2006 | 1            | 1            | 0            | 1       |
| Construction year after 2007            | 0            | 0            | 1            | 0       |
| Lift x floor level                      | 4            | 2            | 3            | 2       |
| Communal swimming pool                  | 1            | 0            | 0            | 1       |
| Floor/area ratio                        | 1.00         | 1.27         | 2.06         | 1.30    |
| % people holding university degree      | 11.10        | 13.70        | 11.43        | 14.00   |
| CP high socioeconomic level             | -0.85        | -0.90        | -0.60        | -0.60   |

Source: Own elaboration

Table S4 Adjustment process for segment 2 (recent apartments in upper-middle class zones)

| Asking Price and Real Estate Features   | Comparable A                         | Comparable B                          | Comparable C                         | Comparable D                         |
|-----------------------------------------|--------------------------------------|---------------------------------------|--------------------------------------|--------------------------------------|
| Asking price                            | 170,000                              | 165,000                               | 165,000                              | 165,000                              |
| Area                                    | 3,145.69 x (84-91)=-22,019.83        | 3,145.69 x (84-75)=28,311.21          | 3,145.69 x (84-85)=-3,145.69         | 3,145.69 x (84-85)=-3,145.69         |
| Air conditioner                         | 23,127.61 x (1-1)=0                  | 23,127.61 x (1-1)=0                   | 23,127.61 x (1-1)=0                  | 23,127.61 x (1-1)=0                  |
| Number of bathrooms                     | 17,365.38 x (1-2)=-17,365.38         | 17,365.38 x (1-1)=0                   | 17,365.38 x (1-2)=-17,365.38         | 17,365.38 x (1-2)=-17,365.38         |
| Heating                                 | 14,224.97 x (1-1)=0                  | 14,224.97 x (1-1)=0                   | 14,224.97 x (1-1)=0                  | 14,224.97 x (1-1)=0                  |
| Quality-retrofit indicator              | 9,417.14 x (1-0)=9,417.14            | 9,417.14 x (1-0)=9,417.14             | 9,417.14 x (1-1)=0                   | 9,417.14 x (1-0)=9,417.14            |
| Area^2                                  | -8.65 x (7,056-8,281)=-10,530.62     | -8.65 x (7,056-5,625)=-12,371.57      | -8.65 x (7,056-7,225)=-1,461.07      | -8.65 x (7,056-7,225)=-1,461.07      |
| Construction year between 1982 and 2006 | 16,021.06 x (1-1)=0                  | 16,021.06 x (1-0)=16,021.06           | 16,021.06 x (1-1)=0                  | 16,021.06 x (1-0)=16,021.06          |
| Construction year after 2007            | 19,110.34 x (0-0)=0                  | 19,110.34 x (0-1)=-19,110.34          | 19,110.34 x (0-0)=0                  | 19,110.34 x (0-0)=0                  |
| Lift x floor level                      | 3,149.27 x (2-0)=6298.54             | 3,149.27 x (2-3)=-3,149.27            | 3,149.27 x (2-2)=0                   | 3,149.27 x (2-1)=3,149.27            |
| Communal swimming pool                  | 24,758.56 x (1-0)=24,758.56          | 24,758.56 x (1-0)=24,758.56           | 24,758.56 x (1-0)=24,758.56          | 24,758.56 x (1-0)=24,758.56          |
| Floor/area ratio                        | 10,759.85 x (1.3-1.44)=-1,460.17     | 10,759.85 x (1.3-1.68)=-4,048.55      | 10,759.85 x (1.3-0.91)=4,146.41      | 10,759.85 x (1.3-1.27)=273.98        |
| % people holding university degree      | 1,057.36 x (14-12.42)=1,672.75       | 1,057.36 x (14-21.66)=-8,096.45       | 1,057.36 x (14-9.69)=4,557.10        | 1,057.36 x (14-18.70)=-4,965.38      |
| CP high socioeconomic level             | 14,588.97 x (-0.60-(-0.84))=3,545.25 | 14,588.97 x (-0.60-(-0.08))=-7,634.29 | 14,588.97 x (-0.60-(-1.18))=8,494.95 | 14,588.97 x (-0.60-(-0.23))=-5385.81 |
| Corrected Price                         | 185,437                              | 189,097                               | 187,907                              | 189,219                              |

  

| Asking Price and Real Estate Features   | Comparable E                         | Comparable F                         | Comparable G                      |
|-----------------------------------------|--------------------------------------|--------------------------------------|-----------------------------------|
| Asking price                            | 160,000                              | 162,000                              | 160,000                           |
| Area                                    | 3,145.69 x (84-80)=12,582.76         | 3,145.69 x (84-97)=-40,893.96        | 3,145.69 x (84-75)=28,311.21      |
| Air conditioner                         | 23,127.61 x (1-0)=23,127.61          | 23,127.61 x (1-0)=23,127.61          | 23,127.61 x (1-1)=0               |
| Number of bathrooms                     | 17,365.38 x (1-2)=-17,365.38         | 17,365.38 x (1-2)=-17,365.38         | 17,365.38 x (1-1)=0               |
| Heating                                 | 14,224.97 x (1-1)=0                  | 14,224.97 x (1-1)=0                  | 14,224.97 x (1-1)=0               |
| Quality-retrofit indicator              | 9,417.14 x (1-0)=9,417.14            | 9,417.14 x (1-0)=9,417.14            | 9,417.14 x (1-1)=0                |
| Area^2                                  | -8.65 x (7,056-6,400)=-5,671.39      | -8.65 x (7,056-9,409)=-20,342.64     | -8.65 x (7,056-5,625)=-12,371.57  |
| Construction year between 1982 and 2006 | 16,021.06 x (1-1)=0                  | 16,021.06 x (1-1)=0                  | 16,021.06 x (1-0)=16,021.06       |
| Construction year after 2007            | 19,110.34 x (0-0)=0                  | 19,110.34 x (0-0)=0                  | 19,110.34 x (0-1)=-19,110.34      |
| Lift x floor level                      | 3,149.27 x (2-4)=-6,298.54           | 3,149.27 x (2-2)=0                   | 3,149.27 x (2-3)=-3,149.27        |
| Communal swimming pool                  | 24,758.56 x (1-1)=0                  | 24,758.56 x (1-0)=24,758.56          | 24,758.56 x (1-0)=24,758.56       |
| Floor/area ratio                        | 10,759.85 x (1.3-1.00)=3,265.24      | 10,759.85 x (1.3-1.27)=282.79        | 10,759.85 x (1.3-2.06)=-8,146.90  |
| % people holding university degree      | 1,057.36 x (14-11.10)=3,070.20       | 1,057.36 x (14-13.70)=318.71         | 1,057.36 x (14-11.43)=2,722.30    |
| CP high socioeconomic level             | 14,588.97 x (-0.60-(-0.85))=3,580.85 | 14,588.97 x (-0.60-(-0.90))=4,308.77 | 14,588.97 x (-0.60-(-0.60))=21.94 |
| Corrected Price                         | 185,709                              | 186,297                              | 189,057                           |

  

|                                 |         |                                      |       |
|---------------------------------|---------|--------------------------------------|-------|
| Unadjusted average value (Euro) | 163,857 | Unadjusted standard deviation (Euro) | 3,532 |
| Adjusted media value (Euro)     | 187,532 | Adjusted standard deviation (Euro)   | 1,683 |

Source: Own elaboration

### 3.3 Results for segment 3 (deficient apartments in working-class zones)

Table S5 Data Description for segment 3 (deficient apartments in working-class zones)

| Asking Price and Real Estate Features   | Comparable A | Comparable B | Comparable C | Comparable D |
|-----------------------------------------|--------------|--------------|--------------|--------------|
| Asking price (euros)                    | 165,000      | 110,000      | 95,000       | 120,000      |
| Area (m2)                               | 80           | 73           | 68           | 77           |
| Area^2                                  | 6,400        | 5,329        | 4,624        | 5,929        |
| Construction year between 1982 and 2006 | 0            | 0            | 0            | 0            |
| Construction year after 2007            | 0            | 0            | 0            | 0            |
| A                                       | 1            | 0            | 0            | 0            |
| C                                       | 0            | 0            | 1            | 0            |
| D                                       | 0            | 0            | 0            | 0            |
| Floor/area ratio                        | 0.58         | 0.98         | 1.48         | 1.49         |
| Centrality indicator                    | 11.18        | 11.14        | 9.94         | 12.13        |
| CP high socioeconomic level             | -0.24        | -0.63        | -0.59        | -0.74        |
| % buildings with doorman service        | 2.21         | 3.54         | 2.21         | 6.14         |

  

| Asking Price and Real Estate Features   | Comparable E | Comparable F | Comparable G | Subject |
|-----------------------------------------|--------------|--------------|--------------|---------|
| Asking price (euros)                    | 125,000      | 95,000       | 100,000      | ?       |
| Area (m2)                               | 82           | 63           | 65           | 73      |
| Area^2                                  | 6,724        | 3,969        | 4,225        | 5,329   |
| Construction year between 1982 and 2006 | 0            | 0            | 0            | 0       |
| Construction year after 2007            | 0            | 0            | 0            | 0       |
| A                                       | 0            | 0            | 0            | 1       |
| C                                       | 0            | 0            | 0            | 0       |
| D                                       | 0            | 1            | 0            | 0       |
| Floor/area ratio                        | 1.57         | 1.60         | 1.71         | 1.30    |
| Centrality indicator                    | 10.40        | 12.81        | 9.54         | 11.00   |
| CP high socioeconomic level             | -0.22        | -1.11        | -0.23        | -0.50   |
| % buildings with doorman service        | 4.98         | 5.50         | 2.42         | 3.86    |

Source: Own elaboration

Table S6 Adjustment process for segment 3 (deficient apartments in working-class zones)

| Asking Price and Real Estate Featu      | Comparable A                                  | Comparable B                                 | Comparable C                                 | Comparable D                                 |
|-----------------------------------------|-----------------------------------------------|----------------------------------------------|----------------------------------------------|----------------------------------------------|
| Asking price                            | 165,000                                       | 110,000                                      | 95,000                                       | 120,000                                      |
| Area                                    | $3,271.45 \times (73-80) = -22,900.15$        | $3,271.45 \times (73-73) = 0$                | $3,271.45 \times (73-68) = 16,357.25$        | $3,271.45 \times (73-77) = -13,085.80$       |
| Area^2                                  | $-8.75 \times (5,329-6,400) = 9,506.91$       | $-8.75 \times (5,329-5,329) = 0$             | $-8.75 \times (5,329-4,624) = -6040.30$      | $-8.75 \times (5,329-5,929) = 5,383.75$      |
| Construction year between 1982 and 2006 | $13,070.92 \times (0-0) = 0$                  | $13,070.92 \times (0-0) = 0$                 | $13,070.92 \times (0-0) = 0$                 | $13,070.92 \times (0-0) = 0$                 |
| Construction year after 2007            | $40,001.60 \times (0-0) = 0$                  | $40,001.60 \times (0-0) = 0$                 | $40,001.60 \times (0-0) = 0$                 | $40,001.60 \times (0-0) = 0$                 |
| A                                       | $50,562.20 \times (1-1) = 0$                  | $50,562.20 \times (1-0) = 50,562.20$         | $50,562.20 \times (1-0) = 50,562.20$         | $50,562.20 \times (1-0) = 50,562.20$         |
| C                                       | $-13,131.92 \times (0-0) = 0$                 | $-13,131.92 \times (0-0) = 0$                | $-13,131.92 \times (0-1) = 13,131.92$        | $-13,131.92 \times (0-0) = 0$                |
| D                                       | $11,889.69 \times (0-0) = 0$                  | $11,889.69 \times (0-0) = 0$                 | $11,889.69 \times (0-0) = 0$                 | $11,889.69 \times (0-0) = 0$                 |
| Floor/area ratio                        | $3,556.57 \times (1.3-0.58) = 2,551.646$      | $3,556.57 \times (1.3-0.98) = 1,147.25$      | $3,556.57 \times (1.3-1.38) = -651.67$       | $3,556.57 \times (1.3-1.49) = -664.29$       |
| Centrality indicator                    | $1,118.75 \times (11-11.18) = -203.23$        | $1,118.75 \times (11-11.14) = -152.70$       | $1,118.75 \times (11-9.94) = 1,190.29$       | $1,118.75 \times (11-12.13) = -1,259.97$     |
| CP high socioeconomic level             | $15,487.24 \times (-0.5-(-0.24)) = -3,963.78$ | $15,487.24 \times (-0.5-(-0.63)) = 1,997.83$ | $15,487.24 \times (-0.5-(-0.59)) = 1,334.23$ | $15,487.24 \times (-0.5-(-0.74)) = 3,663.13$ |
| % buildings with doorman service        | $1,599.05 \times (3.86-2.21) = 2,638.68$      | $1,599.05 \times (3.86-3.54) = 517.69$       | $1,599.05 \times (3.86-2.21) = 2,644.47$     | $1,599.05 \times (3.86-6.14) = -3,643.10$    |
| Corrected Price                         | 152,630                                       | 164,294                                      | 173,618                                      | 161,046                                      |

  

|                                         | Comparable E                                  | Comparable F                                 | Comparable G                                  |
|-----------------------------------------|-----------------------------------------------|----------------------------------------------|-----------------------------------------------|
| Asking price                            | 125,000                                       | 95,000                                       | 100,000                                       |
| Area                                    | $3,271.45 \times (73-82) = -29,443.05$        | $3,271.45 \times (73-63) = 32,714.50$        | $3,271.45 \times (73-65) = 26,171.60$         |
| Area^2                                  | $-8.75 \times (5,329-6,724) = 12,343.22$      | $-8.75 \times (5,329-3,969) = -11,774.21$    | $-8.75 \times (5,329-4,225) = -9,533.17$      |
| Construction year between 1982 and 2006 | $13,070.92 \times (0-0) = 0$                  | $13,070.92 \times (0-0) = 0$                 | $13,070.92 \times (0-0) = 0$                  |
| Construction year after 2007            | $40,001.60 \times (0-0) = 0$                  | $40,001.60 \times (0-0) = 0$                 | $40,001.60 \times (0-0) = 0$                  |
| A                                       | $50,562.20 \times (1-0) = 50,562.20$          | $50,562.20 \times (1-0) = 50,562.20$         | $50,562.20 \times (1-0) = 50,562.20$          |
| C                                       | $-13,131.92 \times (0-0) = 0$                 | $-13,131.92 \times (0-0) = 0$                | $-13,131.92 \times (0-0) = 0$                 |
| D                                       | $11,889.69 \times (0-0) = 0$                  | $11,889.69 \times (0-1) = -11,889.69$        | $11,889.69 \times (0-0) = 0$                  |
| Floor/area ratio                        | $3,556.57 \times (1.3-1.57) = -961.61$        | $3,556.57 \times (1.3-1.60) = -1,052.76$     | $3,556.57 \times (1.3-1.71) = -1,455.95$      |
| Centrality indicator                    | $1,118.75 \times (11-10.40) = 666.38$         | $1,118.75 \times (11-12.81) = -2,022.76$     | $1,118.75 \times (11-9.54) = 1,628.98$        |
| CP high socioeconomic level             | $15,487.24 \times (-0.5-(-0.22)) = -4,277.72$ | $15,487.24 \times (-0.5-(-1.11)) = 9,390.59$ | $15,487.24 \times (-0.5-(-0.23)) = -4,207.91$ |
| % buildings with doorman service        | $1,599.05 \times (3.86-4.98) = -1,796.77$     | $1,599.05 \times (3.86-5.50) = -2,630.34$    | $1,599.05 \times (3.86-2.42) = 2,301.41$      |
| Corrected Price                         | 152,184                                       | 158,388                                      | 165,557                                       |

  

|                                 |         |                                      |        |
|---------------------------------|---------|--------------------------------------|--------|
| Unadjusted average value (Euro) | 115,714 | Unadjusted standard deviation (Euro) | 24,737 |
| Adjusted media value (Euro)     | 161,102 | Adjusted standard deviation (Euro)   | 7,587  |

Source: Own elaboration

## Conclusions

As it is detailed in the tables containing the adjustment of prices, in all the 3 housing segments the adjusted value is closer to its average in relation to the unadjusted prices, so the dispersion of the adjusted prices regarding its average value is reduced (*i.e.* standard deviation). So, the adjustment process not only adjusts the original values in order to produce an equivalent price for each of the comparable cases if its relevant features were going to be the same that those of the subject, but also this process renders a more homogeneous price distribution. As a result, the average value calculated departing from the adjusted prices does gain representativeness of its distribution. So, despite that the aim of the paper does not build on real estate valuation, this supplementary file helps to portray the usefulness of the hedonic prices on the adjustment process of the comparison approach.

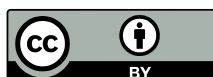

© 2019 by the authors. Submitted for possible open access publication under the terms and conditions of the Creative Commons Attribution (CC BY) license (<http://creativecommons.org/licenses/by/4.0/>).
